# Supplementary material for: Spatiotemporal variability of light attenuation and net ecosystem metabolism in a back-barrier estuary
Source: Copernicus journal article supplement (doi:10.5194/os-2019-106), 2019-10-28
Supplement: Supplementary file 1 [file os-2019-106-supplement.pdf]

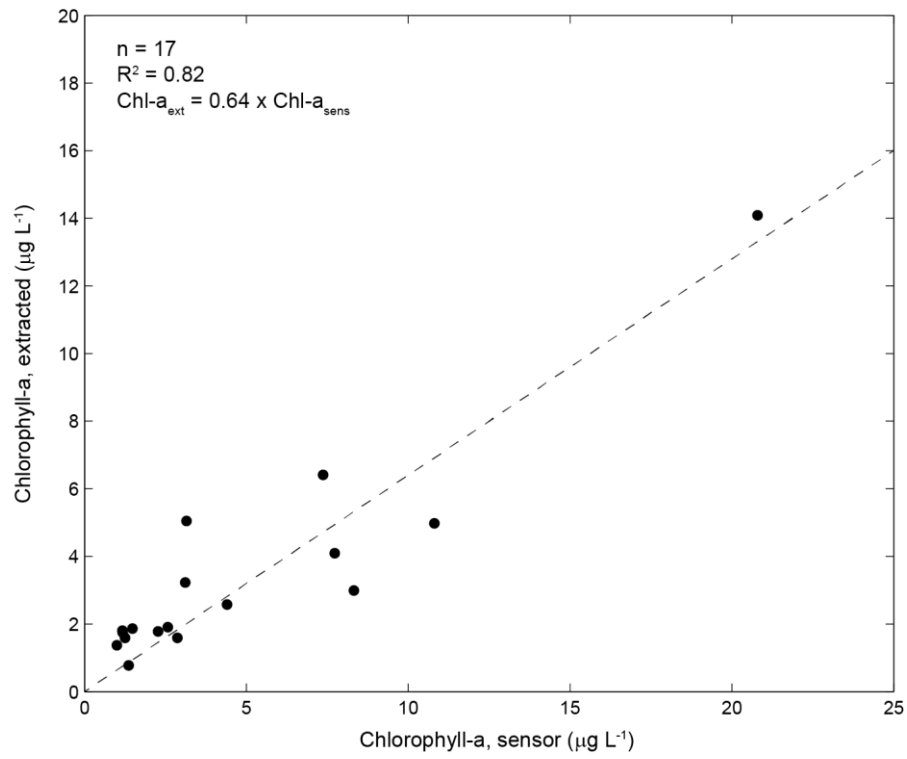

Supplementary Figure 1: Calibration of fluorescence-based chlorophyll-a to laboratory-measured, extraction-based chlorophyll-a.

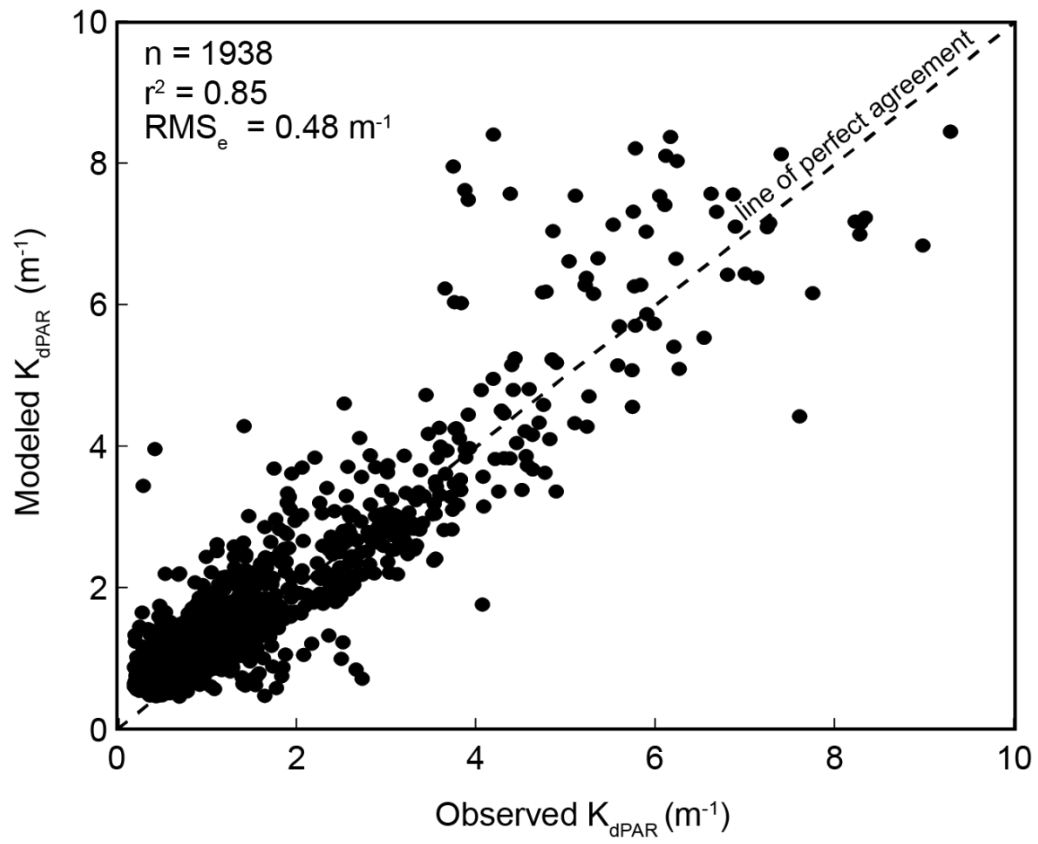

Supplementary Figure 2: Light model assessment, using 30 min averaged values.
