# Supplementary material for: Spatiotemporal variability of light attenuation and net ecosystem metabolism in a back-barrier estuary
Source: Copernicus journal article supplement (doi:10.5194/os-2019-106), 2019-10-28
Supplement: Supplementary file [file os-2019-106-AC1-supplement.pdf]

Response to reviewers, comments in normal text, **responses in bold**

Anonymous Referee #1 Received and published: 10 February 2020

The manuscript by Ganju et al. uses long-term high frequency measurements to quantify biogeochemical dynamics, coherence and metabolism in a shallow back-barrier estuary with focus on the role of submerged aquatic vegetation (SAV). The experimental design comprises four monitoring stations with water quality probes equipped with sensors for turbidity, chlorophyll-a, fDOM and oxygen. PAR sensors were included at two stations. It is concluded that SAV reduce sediment resuspension and thus K<sub>d</sub> and that vegetated sites exhibited higher metabolic rates compared to un-vegetated sites.

Unfortunately, these conclusions are not fully supported by the experimental design and results as explained in detail below. This said, the obtained data seem to be of high quality and may be used to provide some insights into the spatial heterogeneity and metabolic characteristics of contrasting sites within an estuary.

**Thank you for your positive comments. We will rephrase throughout to indicate that the turbidity-shear stress relationships indicate a seasonal pattern that may be related to bed stabilization by microphytobenthos and increased SAV aboveground biomass in the summer.**

Specific comments: The experimental design is not well-chosen for testing the scientific hypothesis of the paper (i.e. that spatiotemporal variability/gradients in well-mixed estuaries is driven by the presence of SAV). Although there are two vegetated and two un-vegetated sites, these sites differ with respect to depth, substrate, eutrophication, etc making it impossible to attribute differences between vegetated and un-vegetated sites to SAV alone. The hypothesis/aim of the study should be revised.

**We will revise the hypothesis as follows:**

**“We hypothesize that even in shallow, well-mixed estuaries there is strong spatiotemporal variability in ecosystem metabolism due to benthic and water column properties, and ensuing feedbacks to sediment resuspension, light attenuation, and primary production.”**

Also, the physical/hydro-morphological/biological characteristics incl. hydrodynamic properties of the monitoring sites as well as the rationale behind the choice of the sites should be carefully described.

**We will add details on the hydrodynamic climate (tide range, subtidal water level fluctuations, velocity), lithology, and organic matter content of the substrate. We will also add rationale behind site selection.**

It is not clear how the signal from the sensors were quality assured/rinsed for outliers, off sets, drifting etc. before use. Please describe any post processing procedure of the raw signals. The max values in table 3 don't indicate a “problem” with e.g. artificial spikes (which is somewhat surprising). However, the 0 values of turbidity, chl<sub>a</sub> and fDOM seems a bit unrealistic.

**The USGS-required data report, cited in the manuscript, contains these details, and we will refer to it in more detail. For brevity we will add the essential details to the text.**

Time series of chlorophyll, with high concentrations during resuspension events suggest domination of suspended microphytobenthos/dead microalgae.

**Agreed, we failed to note that where we discussed peaks in chlorophyll during winter resuspension events in the Results section. We will add this detail.**

Describe/discuss if microalgae primary production is dominated by pelagic and/or benthic microalgae.

**We do not have direct estimates of microalgal production partitioned between sediments and the water column at any of our sites. At the two SAV-dominated sites, the sediment surface is nearly covered by SAV and macroalgae, so we expect that benthic microalgal production is low. At CB11, the water is very turbid and  $k_d$  values indicate that very little light reaches the bottom, so we can presume that water-column microalgae are dominant. For the other channel site, we cannot easily constrain the partitioning between the two environments. We will add these details to the manuscript.**

It is concluded that the presence of SAV controls the shear stress-resuspension relation (P20, L 3). However, as the physical characteristics of especially the shallow sites suggest that microphytobenthos could be abundant, this would significantly influence the shear stress-resuspension relationship as well. Hence, SAV may not be the only/main explanation for the observed seasonal trend in shear stress-resuspension relation.

**Agreed, the most general explanation is that depth controls the availability of light for both SAV and benthic algae; and the presence of both to some degree stabilize the bed in summer more than winter. At the deep sites, no such relationship exists, indicating no change in benthic characteristics. However, it is likely that in a vegetated sandy substrate, the seagrass would dominate bed stabilization over benthic microalgae given shading and coarser sediment. In fact, the data of Ellis et al. indicate organic matter percentages of less than 2% on the sandy shoals. However, we will indicate that benthic algae may contribute to bed stabilization in the summer, and likely account for chlorophyll resuspension signals in winter.**

Ellis, A.M., Marot, M.E., Wheaton, C.J., Bernier, J.C., and Smith, C.G., 2015, A seasonal comparison of surface sediment characteristics in Chincoteague Bay, Maryland and Virginia, USA: U.S. Geological Survey Open-File Report 2015-1219, <http://dx.doi.org/10.3133/ofr20151219>.

Results of significance test/SD would be highly appreciated, when presenting the results for the four sites (e.g. table 3 and text). Fx. it is states that mean (over what time period?) of chl<sub>a</sub> concentration at station CB11 is twice as high as for the other stations (P10, L11-13). It would be nice to know that the observed difference is significant.

**In the revision, we will test significance for all parameters by comparing overlap in means and standard deviations.**

More importantly, it is concluded that vegetated sites exhibited higher metabolic rates compared to un-vegetated sites (e.g. P20, L 6). This conclusion is not supported by the results in Table 1 where the apparent difference in  $P_g$  and  $R_f$  does not seem to be significant between site CB3, CB10 and CB11. Furthermore,  $P_n$  for all stations seems to be statistically similar.

**We believe that the data clearly show that  $P_g$  and  $R_f$  are higher at sites CB3, CB10 and CB11 – which is what we refer to with the term “metabolic rates”. We also state in the text that CB11 is similar to CB3 and CB10 because CB11 is a highly eutrophic site with high chlorophyll-a and water-column phytoplankton production. We agree than  $P_n$  is statistically similar, given that  $P_g$  and  $R_f$  tend to**

**balance each other despite higher gross rates of Pg and Rf.**

Direct PAR measurements (and derived Kd values) are only performed at the two shallow, vegetated sites. Although it is difficult to assess the quality/performance of the model from fig. 2 and 3, it seems reasonable that the model can be used to close the gaps in the time series at these stations. However, since light attenuation is dependent on e.g. particle size it seems unjustified to apply the model for stations where it is not calibrated/validated especially since the sediment at the different stations seems to differ in particle size and quality (mud vs sandy sediments and organics enrichment).

**The light model assessment for sites CB03 and CB10 is shown in supplementary Figure S2. Nonetheless, to test the sensitivity, we ran the light model with variation in the particle backscatter ratio ( $b_{bx}$ ) which is particle size dependent. Please note that an increase in flocculated sediments would increase this ratio, thereby increasing the light attenuation and causing a larger difference in light attenuation between the sandy, vegetated sites and the muddy, unvegetated sites. Modifying the value from 0.017 to 0.025 (47% increase; 0.025 value was used for a different mud-dominated estuary by Ganju et al., 2014) increased the median light attenuation at CB06 by 17% (from 1.35 to 1.58  $m^{-1}$ ) and at CB11 by 11% (from 1.67 to 1.86). We will add this analysis to the revision.**

Determining the optimal sampling frequency is a science in itself and the results regarding the influence of sampling frequency (table 3) is interesting, but as presented it seems as an unfinished story that is not properly treated in the result and discussion section. This part should be either up- or down scaled/skipped.

**We believe that the concept that coarse temporal sampling masks spatial variability is an important one given the common daily sampling approach for dissolved oxygen in many impaired estuaries. We will highlight this concept with examples from the literature in our revision.**

The present study do not examine gradients, so this term should be avoided (e.g. P1, L 13). Use “patchiness” or “spatial variability” instead.

**Agreed, we will revise to “variability”.**

Technical correction: Table 3: State which time period (yearly, season, other?), min, max and mean is covering. Include SD for the mean values. Figure 6: add x-axis titles

**We will correct these.**

Mario Hoppema (Referee) mario.hoppema@awi.de Received and published: 28 February 2020

The manuscript presents an impressive data set for four locations in an estuary, including several useful variables/parameters. The data interpretation reveals some interesting results and conclusions, which are definitely worth publishing in Ocean Science.

However, in some cases there seems to be over-interpretation, for example the difference in metabolic rates between vegetated and unvegetated sites.

**In addition to our response to Reviewer #1 above, we would like to point out that the rates are statistically significant between CB3 and CB10 compare with CB6 – which is the main distinction we discussed between vegetated and unvegetated. We will add statistical significance in the revision.**

Also the data processing should be explained in somewhat more detail.

**We will revise following this comment and Reviewer 1's comment (see above).**

For the net ecosystem metabolism, sometimes NEM is used, for example in Figure 11, and sometimes Pn, for example in Table 1. Please use only one single symbol or abbreviation throughout the manuscript.

**We will correct this.**

Below a list with more detailed comments.

P6, L3 please define RBR D|Wave

**We will revise this to “RBR Virtuoso D|Wave pressure recorder”.**

P6, L7 please define ADCP

**We will revise this to "acoustic Doppler current profiler (ADCP)".**

P9, L2 “across sites across habitats” Modify piece of text?

**We will revise to across sites and across habitats.**

P10, L15 I would recommend not to use NPQ as abbreviation, as it is only used twice; the reader possibly has to search for it here.

**We will revise to “non-photochemical quenching”.**

P10, L19-20 “with the highest values consistently observed at CB11” I think one cannot state that, because the record at CB11 is far from complete; certainly the word “consistently” is misleading here.

**We will revise to “during periods when data were available at CB11”.**

P10, L20 “with lowest fDOM in the winter, possibly due to reduced biological activity” This does not sound like a good explanation. fDOM is not high during maxima of chlorophyll, which seems to indicate that it is not produced by biological activity. Moreover, the highest values seem to occur at site CB11, which receives most riverine freshwater.

**This was meant to suggest that reduced activity in the surrounding watershed and water bodies where DOM is produced, and then exported to the estuary with freshwater. We will clarify in the revision.**

P11,L14-16“Light attenuation at site CB11,with its proximity to freshwater and nutrient sources, was highest overall and more highly influenced by chlorophyll-a and fDOM than at other sites.” This is hard to believe when inspecting Figures 2-5. Moreover, there is much less data available for this site than for the others.

**We will revise to indicate that this is only true during periods of overlap.**

P12, L13-14 “between May and October” My view of the figures says that this should be “between May and September”.

**We will revise.**

P12, L14 “during November to April” I was say “during November to March”

**We will revise.**

P12, L1920 “but instances of net autotrophy ( $P_g > R_t$ ) occurred nearly 70% of the time at the vegetated sites” When I view Figure 11, neither autotrophy nor heterotrophy are statistically significant. This should be mentioned here.

**It is a fair comment to suggest that we did not include statistical analyses to “prove” the existence of net autotrophy, but rather expressed the frequency of net autotrophic conditions. We will mention this consideration of the analysis in the revised discussion.**

P13, L10 at 1-7 day

**We will revise.**

P13, L23-24 “The peak in spectral density was 30% higher at CB03 than CB10” This is really hard to see, if at all, in Fig. 6. Possibly the authors could add a comment to Figure 6 (Diss Oxygen) that the curve of CB3 lies under the one of CB10.

**We will include a comment in the caption or modify the figure for clarity.**

P17, L26 where the canonical C:N (I suggest to add canonical, since this is the well known Redfield ratio based on data from many locations)

**We will revise.**

P19, L1-2 “In fact, modest net autotrophy prevailed during the summer season at vegetated sites but not at un-vegetated sites.” This does not follow from the data in Figure 11, where NEM is around zero all through the year. See also comment above. Actually I am surprised by the uncertainty interval of NEM, which should have been formed from subtracting two larger terms. Because of this, I would expect it to be clearly larger and not smaller than the uncertainty of both of the terms.

**If you compare NEM to  $P_g$  and  $R_t$  on an absolute basis, we agree that NEM is near zero. But our statement simply refers to the mean monthly value of NEM, which although much smaller than  $P_g$  and  $R_t$ , is still greater than zero at the vegetated sites during some seasons, which we define as autotrophic. The error bars around NEM represent the standard deviation of the monthly mean estimates of NEM, which the reviewer is correct in that they are derived as the difference between  $P_g$  and  $R_t$ . But these difference calculations are performed on a daily basis, so the error bars represent the total variation of all ~30 daily  $P_g$ ,  $R_t$ , and NEM rates and thus do not represent uncertainty carried over from each individual NEM calculation.**

References

P22, L4 The usual abbreviation is: Limnol. Oceanogr.

P22, L7 What is this? Ref. No. [UMCES]CBL 04-105a? Report?

P22, L23 The usual abbreviation is: Estuar. Coast. Shelf Sci.,

P23, L16 change: Fremantle

P23, L22 The usual abbreviation is: Estuar. Coast. Shelf Sci.,

P24, L5 The usual abbreviation is: Estuar. Coast. Shelf Sci.,

P24, L16 If the journal consists of one word, the full name should be given: Biogeosciences

P25, L8 Modify journal name: Mar. Ecol. Prog. Ser.

P25, L16 Add pages and doi: S3-S16. doi:10.1890/05-0800.1

P25, L23 The usual abbreviation is: Limnol. Oceanogr.

P26, L7 The usual abbreviation is: Limnol. Oceanogr.

P26, L16 Add volume and pages: Mar. Geol., 404, 1-14

P26, L18 The usual abbreviation is: Limnol. Oceanogr.

P26, L22 Use full journal name: Biogeosciences

P27, L2 The usual abbreviation is: Estuar. Coast. Shelf Sci.,

P27, L12 Please give more info on this publication; report, website?

P27, L14 dito

P27, L16 The usual abbreviation is: Limnol. Oceanogr.

P27, L18 Ocean Mod.

P27, L20 Please add page numbers

**We will correct all reference errors.**

Table 1 Please spell out standard deviation

**We will revise.**

Figure 1 Please also define ADCP and CBWS .

**We will revise.**

Figure 6 I think CB10 in red under the figure panels must be CB11 (unvegetated) Please indicate panels (a) – (d), and then also in the caption. Please explain the x-axis; in the main text the authors talk about “peak at 12.4 h”, but this is not reflected in the figure.

**We will revise.**

Figure 7 It is not clear to me how the oxygen saturation could be 130% in the middle of winter (e.g. at CB11).

**The periods where oxygen saturation exceed 130% do not truly occur in winter, which we would define as mid-December to mid-March. The exception to this is during a brief period in February and early March at CB 11, where chlorophyll-a exceeded 25 ug/L indicating that phytoplankton biomass was high and presumably, primary production rates.**

Figure 9 Please indicate panels (a) – (d), and then also in the caption. Please explain what the bottom structures in the panels mean, and why the data are shown despite these structures.

**We will revise; the shaded areas are zones of the parameter space that are not statistically robust. We will eliminate these in the revision.**
